# Supplementary material for: In silico studies revealed interaction mechanisms of benzylidene–acrylohydrazide derivatives and nsP2 CHIKV
Source: Royal Society of Chemistry journal article supplement (doi:10.1039/d1nj05593c), 2022-01-01

**Figure 1:** LogP histogram of benzylidene-acrylohydrazide derivatives (n=69) synthesized by Giacotti and colleagues [30].

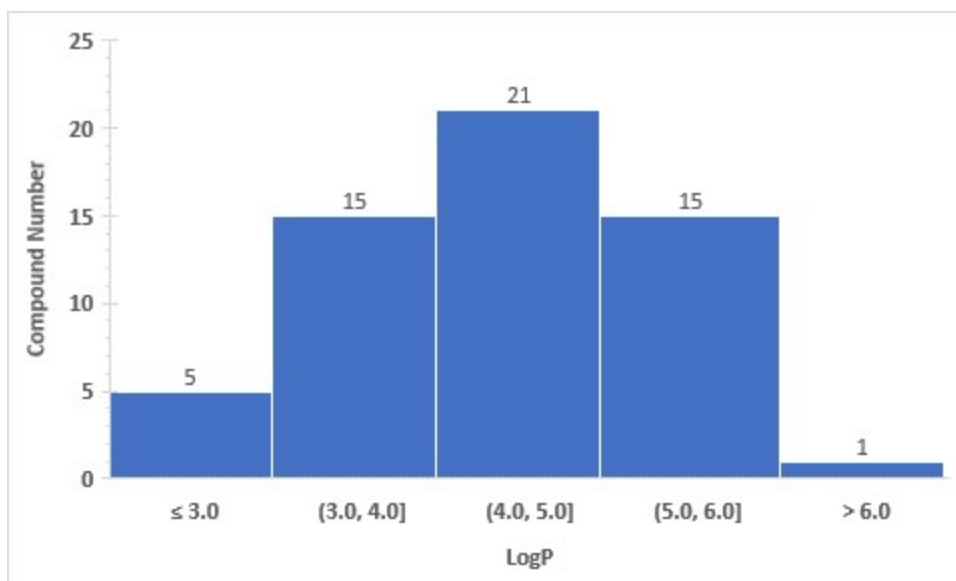

**Figure 2:** Permeability in the blood-brain barrier (BBB) histogram of benzylidene-acrylohydrazide derivatives (n=69) synthesized by Giacotti and colleagues [30].

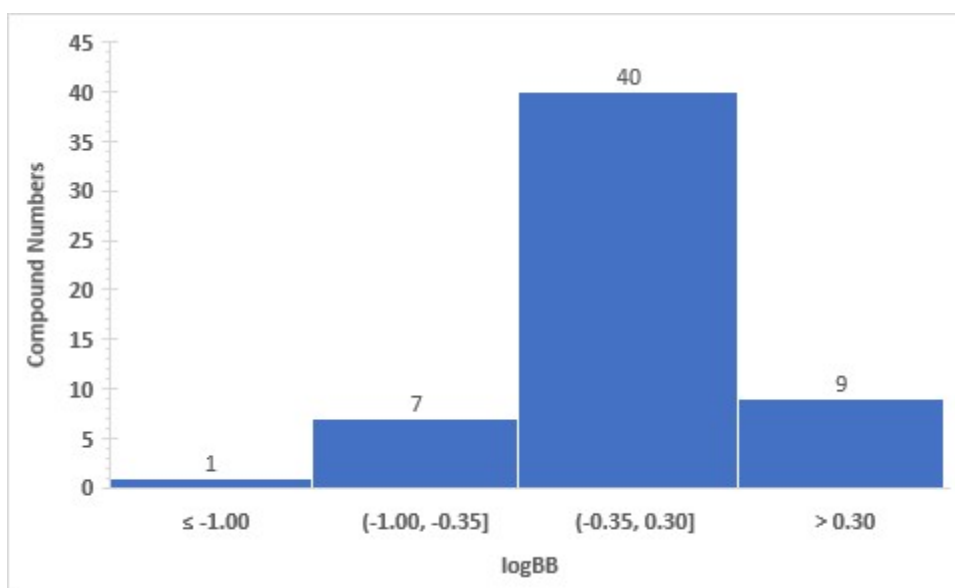

**Figure 3:** Brain permeability (logPS) histogram of benzylidene-acrylohydrazide derivatives (n=69) synthesized by Giacotti and colleagues [30].

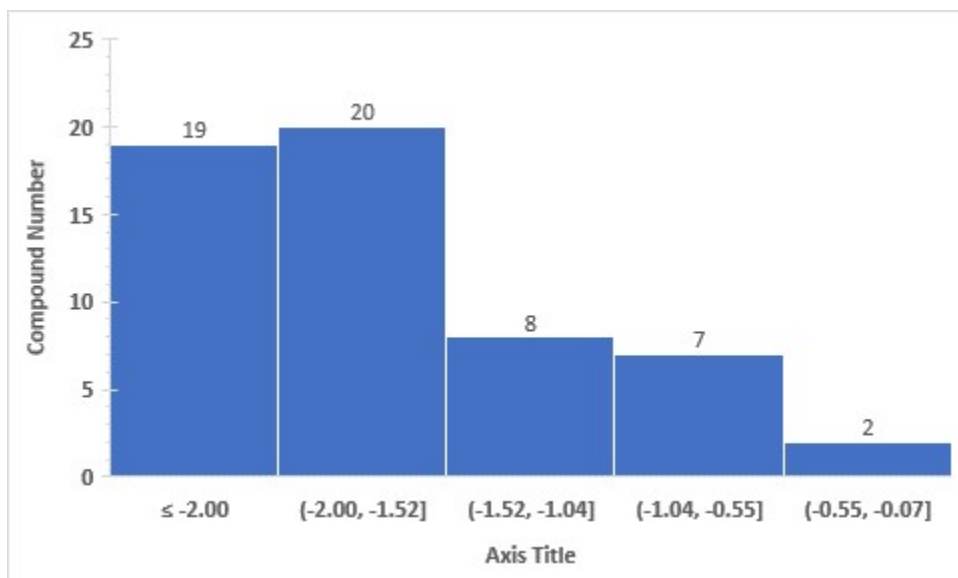

**Figure 4:** Cardiotoxicity prediction of benzylidene-acrylohydrazone derivatives synthesized by Giacotti and colleagues [30] that presented higher values (strong) determined by PREDHERG 4.2 [32] (<http://predherg.labmol.com.br/>). A) 41, B) 42, C) 43, D) 44, E) 77, F) 78, G) 79, H) 80 and I) 93.

A)

## Pred-hERG Results

| Prediction / Potency      | Confidence | Applicability domain (AD)            | Probability Map                                                                       |
|---------------------------|------------|--------------------------------------|---------------------------------------------------------------------------------------|
| Potential cardiotoxic (+) | 60%        | Yes<br>(Value=0.26 and limit = 0.26) |  |
| Strong or Extreme         | 50%        |                                      |                                                                                       |

B)

## Pred-hERG Results

| Prediction / Potency      | Confidence | Applicability domain (AD)              | Probability Map                                                                    |
|---------------------------|------------|----------------------------------------|------------------------------------------------------------------------------------|
| Potential cardiotoxic (+) | 60%        | Yes<br>(Value= 0.26 and limit = 0.26 ) | 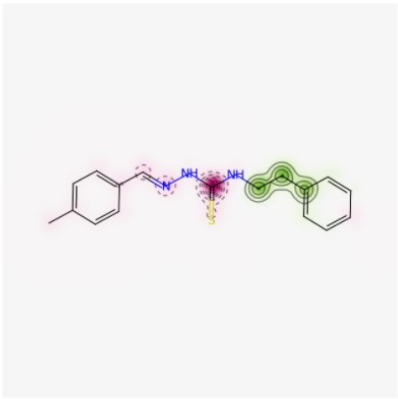 |
| Strong or Extreme         | 60%        |                                        |                                                                                    |

C)

## Pred-hERG Results

| Prediction / Potency      | Confidence | Applicability domain (AD)              | Probability Map                                                                     |
|---------------------------|------------|----------------------------------------|-------------------------------------------------------------------------------------|
| Potential cardiotoxic (+) | 60%        | Yes<br>(Value= 0.26 and limit = 0.26 ) | 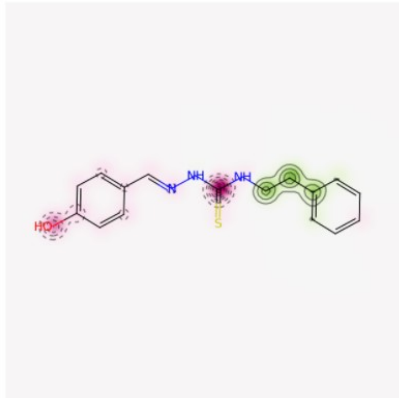 |
| Strong or Extreme         | 60%        |                                        |                                                                                     |

D)

## Pred-hERG Results

| Prediction / Potency      | Confidence | Applicability domain (AD)              | Probability Map                                                                      |
|---------------------------|------------|----------------------------------------|--------------------------------------------------------------------------------------|
| Potential cardiotoxic (+) | 60%        | Yes<br>(Value= 0.27 and limit = 0.26 ) | 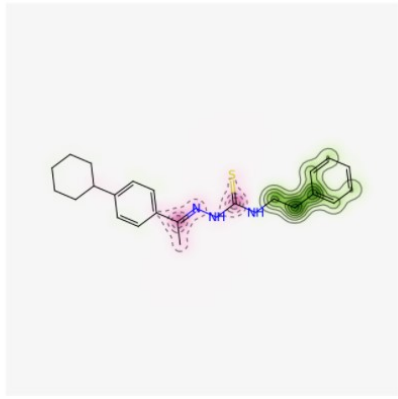 |
| Strong or Extreme         | 60%        |                                        |                                                                                      |

E)

## Pred-hERG Results

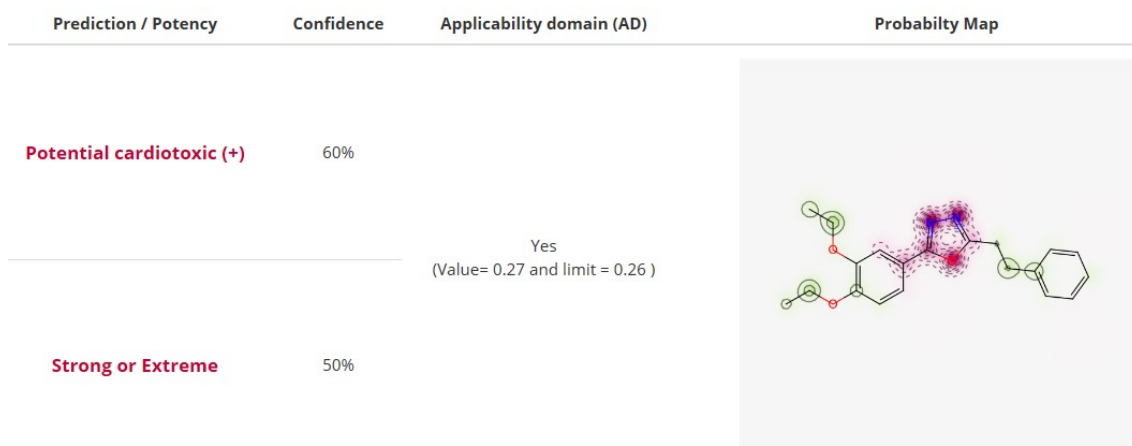

F)

## Pred-hERG Results

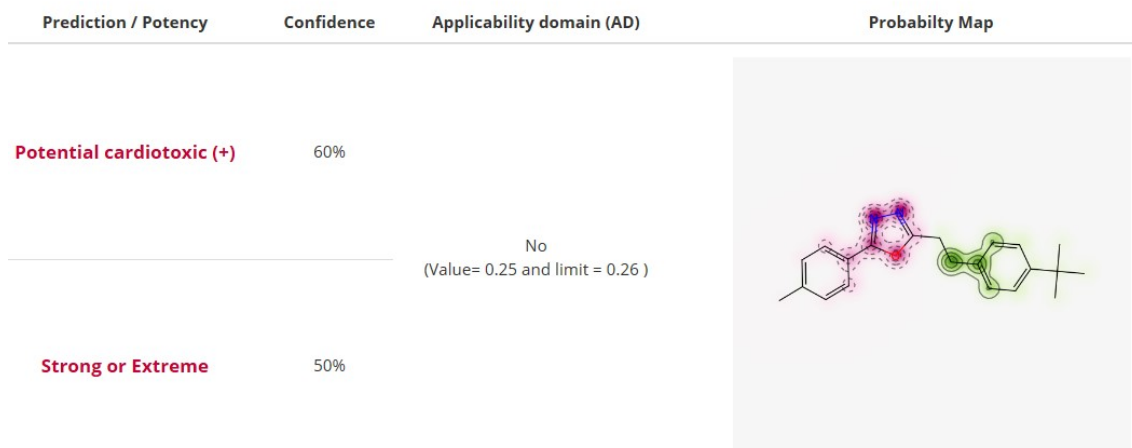

G)

## Pred-hERG Results

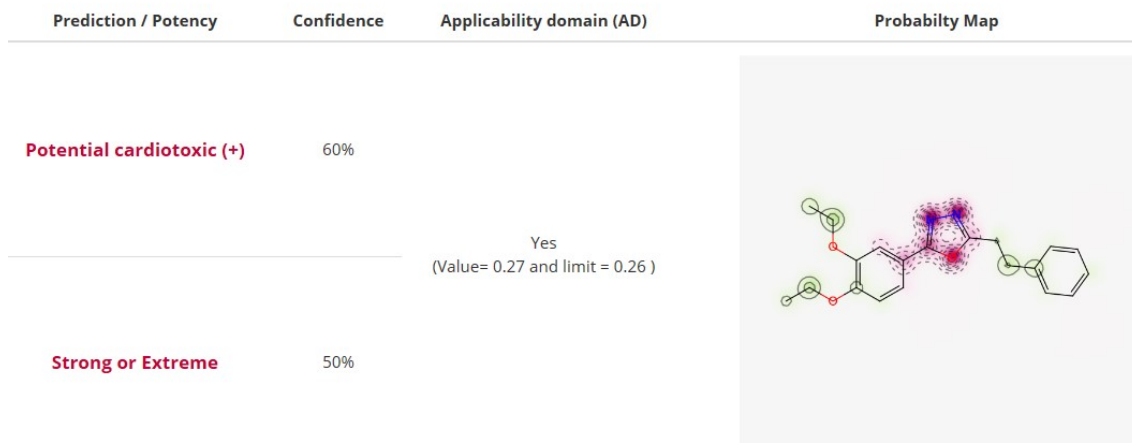

H)

## Pred-hERG Results

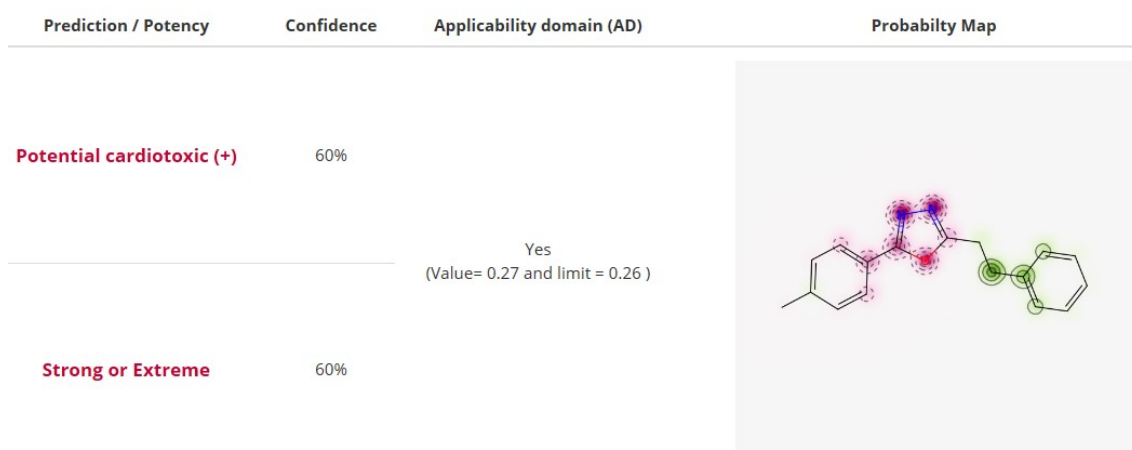

I)

## Pred-hERG Results

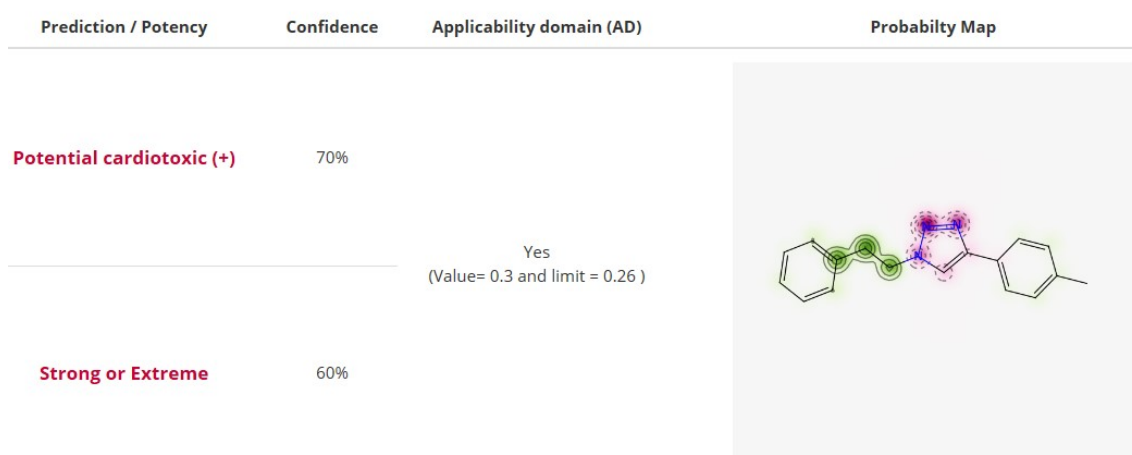

**Figure 5:** Biological activities (pEC50) data of benzylidene-acrylohydrazone derivatives (n=69) synthesized by Giacotti and colleagues [30]. A) pEC50 distribution and B) pEC50 histogram

A)

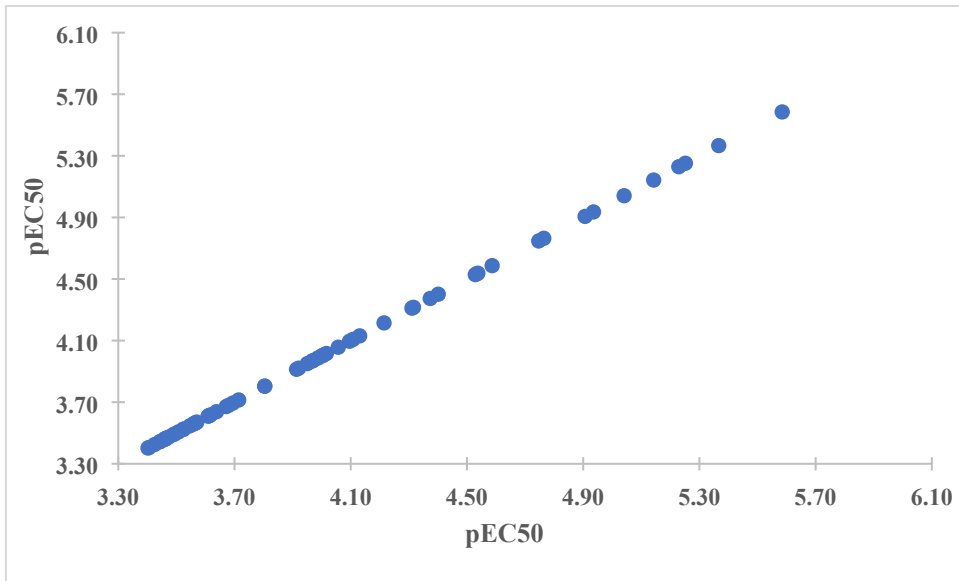

B)

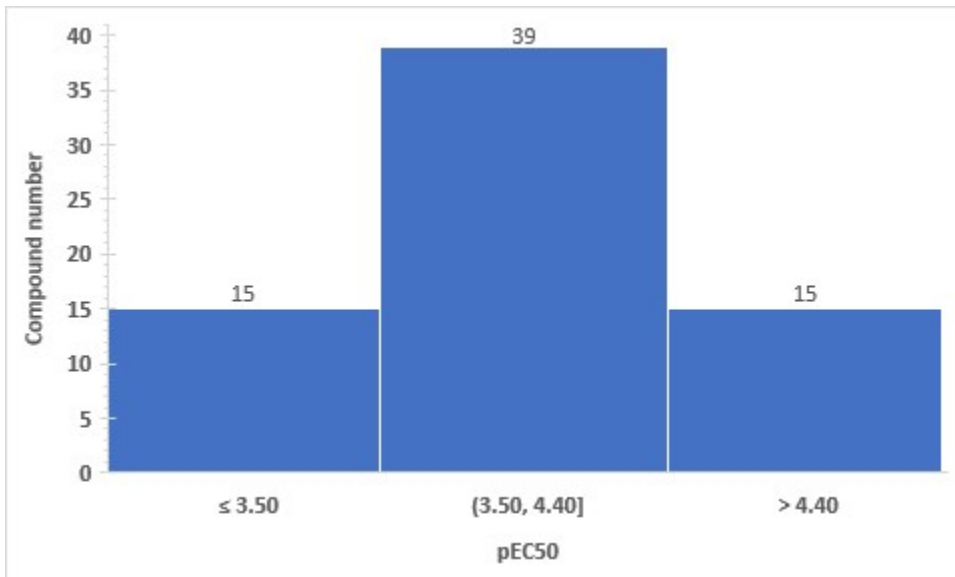

Supplement: d1nj05593c1.pdf [file d1nj05593c1.pdf]
