# Supplementary material for: In silico studies revealed interaction mechanisms of benzylidene–acrylohydrazide derivatives and nsP2 CHIKV
Source: Royal Society of Chemistry journal article supplement (doi:10.1039/d1nj05593c), 2022-01-01
Supplement: d1nj05593c2.pdf [file d1nj05593c2.pdf]

**Table 1:** 2D- structure and biological activities (EC<sub>50</sub>) of benzylidene-acrylohydrazone derivatives synthesized by Giancotti and colleagues [30].

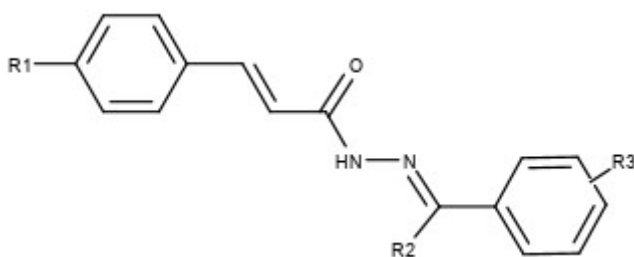

| Derivative | R1              | R2 | R3                               | EC <sub>50</sub> |
|------------|-----------------|----|----------------------------------|------------------|
| 11 a       | <i>i</i> -Pr    | H  | 3,4-OEt                          | >29.2            |
| 11b        | CF <sub>3</sub> | H  | 3,4-OEt                          | 48.9 ± 1.2       |
| 11c        | OMe             | H  | 3,4-OEt                          | >271             |
| 11d        | Ph              | H  | 3,4-OEt                          | >80.2            |
| 12 a       | <i>i</i> -Pr    | H  | 4-Me                             | 25.9             |
| 12b        | CF <sub>3</sub> | H  | 4-Me                             | 96.3 ± 16.1      |
| 12c        | OMe             | H  | 4-Me                             | >112             |
| 12d        | Ph              | H  | 4-Me                             | 230              |
| 13 a       | <i>i</i> -Pr    | Me | 4-C <sub>6</sub> H <sub>11</sub> | >193             |
| 13b        | CF <sub>3</sub> | Me | 4-C <sub>6</sub> H <sub>11</sub> | >241             |
| 13c        | OMe             | Me | 4-C <sub>6</sub> H <sub>11</sub> | >87.7            |
| 13d        | Ph              | Me | 4-C <sub>6</sub> H <sub>11</sub> | >29.6            |
| 16         | <i>i</i> -Pr    | H  | 4-OH                             | >324             |

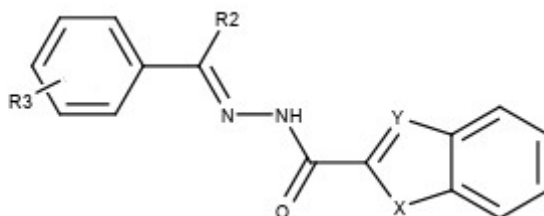

| Derivative | X           | Y    | R2 | R3         | EC <sub>50</sub> |
|------------|-------------|------|----|------------|------------------|
| 20 a       | (CH=CH<br>) | (CH) | H  | Ar=3,4-OEt | >276             |
| 20b        | (N=CH)      | (CH) | H  | Ar=3,4-OEt | >275             |

|      |             |      |    |                 |      |
|------|-------------|------|----|-----------------|------|
| 20c  | (CH=CH<br>) | (N)  | H  | Ar=3,4-OEt      | >275 |
| 20d  | (NH)        | (CH) | H  | Ar=3,4-OEt      | >213 |
| 20e  | (NH)        | (N)  | H  | Ar=3,4-OEt      | >284 |
| 21 a | (CH=CH<br>) | (CH) | H  | Ar=4-Me         | >347 |
| 21b  | (N=CH)      | (CH) | H  | Ar=4-Me         | >346 |
| 21c  | (CH=CH<br>) | (N)  | H  | Ar=4-Me         | >346 |
| 21d  | (NH)        | (CH) | H  | Ar=4-Me         | >361 |
| 21e  | (NH)        | (N)  | H  | Ar=4-Me         | >120 |
| 22 a | (CH=CH<br>) | (CH) | H  | Ar= 4-OH        | >344 |
| 22b  | (N=CH)      | (CH) | H  | Ar= 4-OH        | >343 |
| 22c  | (CH=CH<br>) | (N)  | H  | Ar= 4-OH        | >343 |
| 22d  | (NH)        | (CH) | H  | Ar= 4-OH        | 348  |
| 22e  | (NH)        | (N)  | H  | Ar= 4-OH        | >357 |
| 23 a | (CH=CH<br>) | (CH) | Me | R3= 4-<br>C6H11 | >270 |
| 23b  | (N=CH)      | (CH) | Me | R3= 4-<br>C6H11 | >202 |
| 23c  | (CH=CH<br>) | (N)  | Me | R3= 4-<br>C6H11 | >269 |
| 23d  | (NH)        | (CH) | Me | R3= 4-<br>C6H11 | >209 |
| 23e  | (NH)        | (N)  | Me | R3= 4-<br>C6H11 | 2.6  |

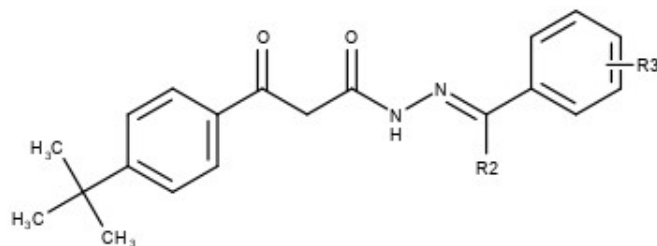

| Derivative | R2 | R3           | EC <sub>50</sub> |
|------------|----|--------------|------------------|
| 27         | H  | Ar = 3,4-OEt | >244             |
| 28         | H  | Ar = 4-Me    | >74              |
| 29         | H  | Ar = 4-OH    | 7.2 ± 1.3        |

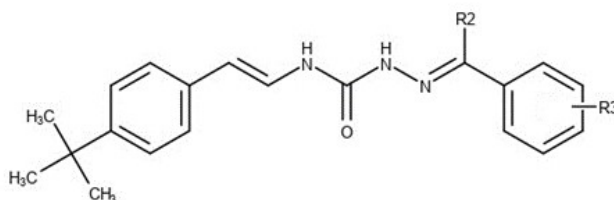

| Derivative | R2 | R3                                    | EC <sub>50</sub> |
|------------|----|---------------------------------------|------------------|
| 35         | H  | Ar = 3,4-OEt                          | >100             |
| 36         | H  | Ar = 4-Me                             | 246 ± 52.1       |
| 37         | H  | Ar = 4-OH                             | 5,6 ± 0.4        |
| 38         | Me | Ar = 4-C <sub>6</sub> H <sub>11</sub> | 42.3 ± 15.7      |

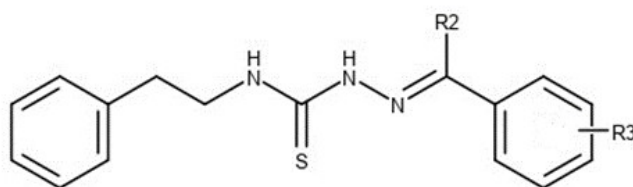

| Derivative | R2 | R3           | EC <sub>50</sub> |
|------------|----|--------------|------------------|
| 41         | H  | Ar = 3,4-OEt | 5.9 ± 1.1        |

|    |    |                                       |             |
|----|----|---------------------------------------|-------------|
| 42 | H  | Ar = 4-Me                             | >336        |
| 43 | H  | Ar = 4-OH                             | 48.3 ± 19.9 |
| 44 | Me | Ar = 4-C <sub>6</sub> H <sub>11</sub> | 4.3 ± 0.5   |

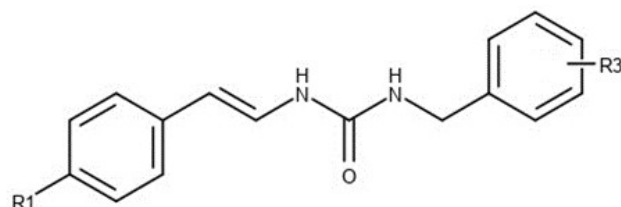

| Derivative | R1           | R3      | EC <sub>50</sub> |
|------------|--------------|---------|------------------|
| 51         | <i>t</i> -Bu | 3,4-OMe | 11.6             |
| 52         | <i>t</i> -Bu | 4-Me    | >103             |
| 53         | <i>t</i> -Bu | H       | >107             |
| 54         | H            | 3,4-OMe | >320             |
| 55         | H            | 4-Me    | >376             |

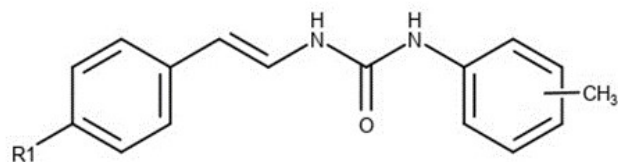

| Derivative | R1           | R3   | EC <sub>50</sub> |
|------------|--------------|------|------------------|
| 58         | <i>t</i> -Bu | 4-Me | >61              |
| 59         | <i>t</i> -Bu | 4-OH | 9.1              |

|    |   |      |      |
|----|---|------|------|
| 60 | H | 4-Me | >396 |
| 61 | H | 4-OH | >393 |

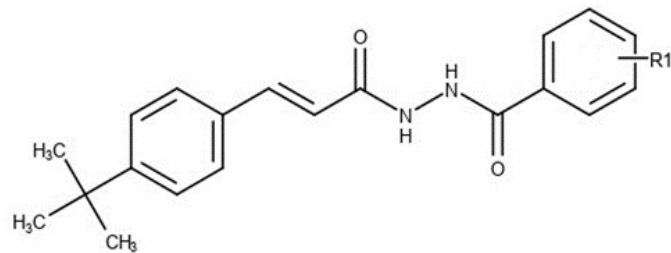

| Derivative | R3      | EC <sub>50</sub> |
|------------|---------|------------------|
| 69         | 3,4-OEt | >244             |
| 70         | 4-Me    | >99.1            |

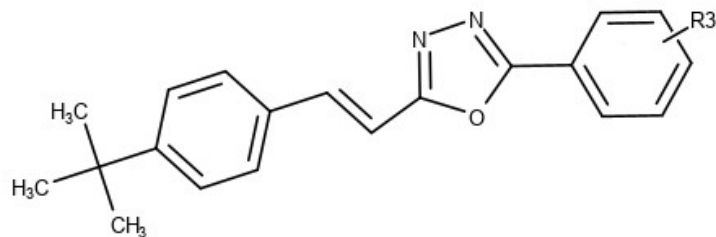

| Derivative | R3      | EC <sub>50</sub> |
|------------|---------|------------------|
| 71         | 3,4-OEt | 29               |
| 72         | 4-Me    | >157             |

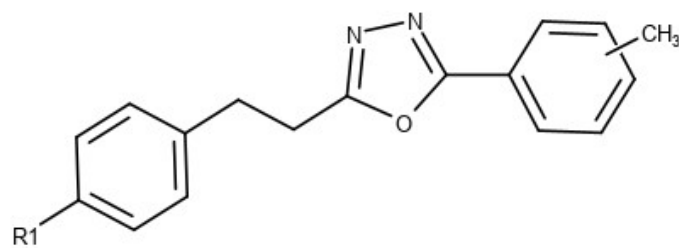

| Derivative | R1 | R3 | EC <sub>50</sub> |
|------------|----|----|------------------|
|------------|----|----|------------------|

|    |              |         |            |
|----|--------------|---------|------------|
| 77 | <i>t</i> -Bu | 3,4-OEt | 12.4 ± 2.1 |
| 78 | <i>t</i> -Bu | 4-Me    | 17.2       |
| 79 | H            | 3,4-OEt | >98.4      |
| 80 | H            | 4-Me    | >378       |

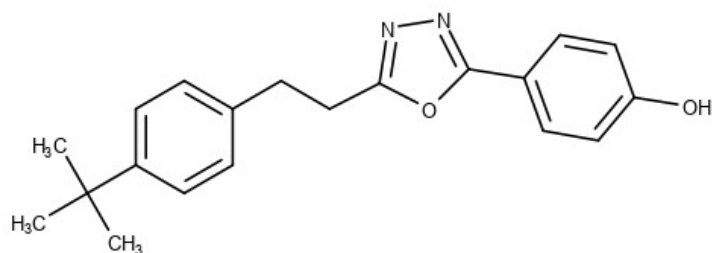

| Derivativ<br>e | EC <sub>50</sub> |
|----------------|------------------|
| 93             | 122 ± 15         |

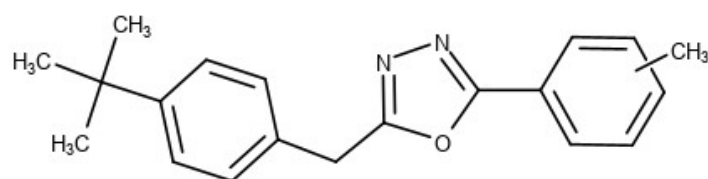

| Derivati<br>ve | R3      | EC <sub>50</sub> |
|----------------|---------|------------------|
| 88             | 3,4-OEt | 39.7             |
| 89             | 4-Me    | 17.9             |

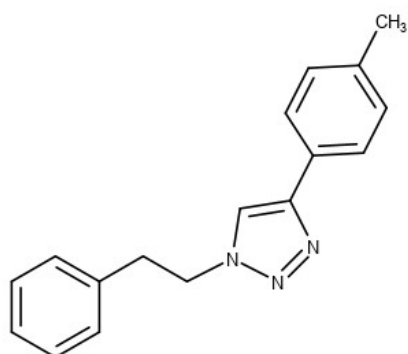

| Derivative | EC <sub>50</sub> |
|------------|------------------|
| 93         | 122 ± 15         |

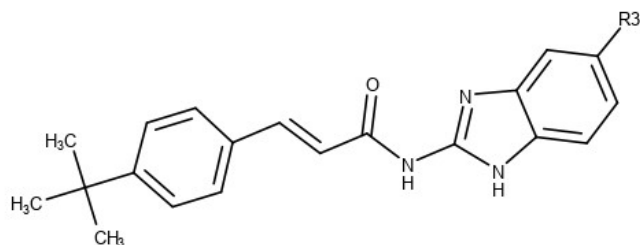

| Derivative | R3 | EC <sub>50</sub> |
|------------|----|------------------|
| 98         | Me | >300             |
| 99         | H  | >157             |

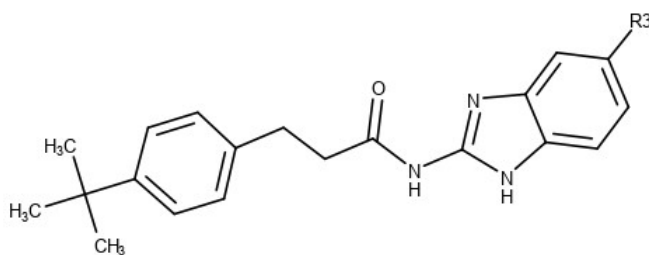

| Derivative | R3 | EC <sub>50</sub> |
|------------|----|------------------|
| 100        | Me | >298             |
| 101        | H  | >311             |
