# Supplementary material for: In silico studies revealed interaction mechanisms of benzylidene–acrylohydrazide derivatives and nsP2 CHIKV
Source: Royal Society of Chemistry journal article supplement (doi:10.1039/d1nj05593c), 2022-01-01
Supplement: d1nj05593c3.pdf [file d1nj05593c3.pdf]

**Table 2:** Absorption, distribution, metabolism, excretion and toxicity (ADMET) properties of the benzylidene-acrylohydrazone derivatives predicted by pkCSM [33](<http://biosig.unimelb.edu.au/pkCSM/>), PREDHERG 4.2 [34] (<http://predherg.labmol.com.br/>) and DataWarrior 5.2.1 [35].

| Code number | Lipinski's rule | LogP | Hepatotoxicity | BBB Permeability | Brain Permeability | CaCo2 Permeability | Intestinal Absorption | hERG I inib. | hERG II inib. | Cardiotoxicity   | Mutagenic | Tumorigenic | Reproductive Effects | Irritant | Druglikeness | Molecular Mass | Rotatable bonds | Hydrogen bond acceptors (HBA) | Hydrogen bond donors (HBD) |
|-------------|-----------------|------|----------------|------------------|--------------------|--------------------|-----------------------|--------------|---------------|------------------|-----------|-------------|----------------------|----------|--------------|----------------|-----------------|-------------------------------|----------------------------|
| 11a         | yes             | 5.1  | yes            | -0.41            | -2.18              | 1.05               | 92.5                  | no           | yes           | Non-cardiotoxic  | no        | no          | no                   | no       | 13.8         | 380.49         | 9               | 4                             | 1                          |
| 11b         | yes             | 4.7  | yes            | -0.31            | -2.18              | 1.45               | 91.5                  | no           | yes           | Non-cardiotoxic  | no        | no          | no                   | no       | -56.0        | 406.40         | 8               | 4                             | 1                          |
| 11c         | yes             | 3.7  | yes            | -0.29            | -2.52              | 1.02               | 95.2                  | no           | yes           | Non-cardiotoxic  | no        | no          | low                  | high     | 16.2         | 368.43         | 9               | 5                             | 1                          |
| 11d         | yes             | 5.5  | yes            | -0.35            | -2.05              | 1.05               | 94.1                  | no           | yes           | Weak or moderate | no        | no          | no                   | no       | 15.9         | 414.51         | 9               | 4                             | 1                          |
| 12a         | yes             | 5.2  | yes            | 0.06             | -0.72              | 1.45               | 91.7                  | no           | yes           | Non-cardiotoxic  | no        | no          | no                   | no       | 28.0         | 306.41         | 5               | 2                             | 1                          |
| 12b         | yes             | 4.9  | yes            | 0.16             | -0.83              | 1.45               | 90.7                  | no           | yes           | Non-cardiotoxic  | no        | no          | no                   | no       | -41.1        | 332.33         | 4               | 2                             | 1                          |
| 12c         | yes             | 3.8  | no             | -0.10            | -2.10              | 1.35               | 94.4                  | no           | yes           | Non-cardiotoxic  | no        | no          | low                  | high     | 30.3         | 294.35         | 5               | 3                             | 1                          |
| 12d         | yes             | 5.6  | no             | 0.13             | -0.58              | 1.09               | 93.3                  | no           | yes           | Non-cardiotoxic  | no        | no          | no                   | no       | 30.8         | 340.43         | 5               | 2                             | 1                          |
| 13a         | yes             | 6.7  | yes            | -0.03            | -0.95              | 1.22               | 89.2                  | no           | yes           | Non-cardiotoxic  | no        | no          | no                   | no       | -29.5        | 388.56         | 6               | 2                             | 1                          |
| 13b         | yes             | 6.3  | yes            | 0.03             | -0.44              | 1.10               | 87.6                  | no           | yes           | Weak or moderate | no        | no          | no                   | no       | -98.8        | 414.47         | 5               | 2                             | 1                          |
| 13c         | yes             | 5.3  | yes            | -0.07            | -1.75              | 1.24               | 90.0                  | no           | yes           | Non-cardiotoxic  | no        | no          | low                  | high     | -26.6        | 376.50         | 6               | 3                             | 1                          |
| 13d         | yes             | 7.1  | yes            | -0.01            | -0.19              | 1.06               | 90.2                  | no           | yes           | Non-cardiotoxic  | no        | no          | no                   | no       | -26.9        | 422.57         | 6               | 2                             | 1                          |
| 16          | yes             | 4.4  | no             | -0.16            | -2.03              | 1.32               | 88.6                  | no           | yes           | Non-cardiotoxic  | no        | no          | no                   | no       | 28.0         | 308.38         | 5               | 3                             | 2                          |
| 20a         | yes             | 4.4  | yes            | -0.17            | -2.08              | 1.07               | 93.6                  | no           | yes           | Non-cardiotoxic  | no        | no          | no                   | no       | 28.0         | 362.43         | 7               | 4                             | 1                          |
| 20b         | yes             | 3.5  | yes            | -0.37            | -2.32              | 1.19               | 95.4                  | no           | yes           | Non-cardiotoxic  | no        | no          | no                   | no       | 28.0         | 363.42         | 7               | 5                             | 1                          |
| 20c         | yes             | 3.9  | yes            | -0.39            | -2.37              | 1.21               | 94.8                  | no           | yes           | Non-cardiotoxic  | no        | no          | no                   | no       | 28.0         | 363.42         | 7               | 5                             | 1                          |
| 20d         | yes             | 3.4  | yes            | 0.02             | -0.07              | 1.27               | 91.4                  | no           | yes           | Non-cardiotoxic  | no        | no          | no                   | no       | 40.5         | 351.41         | 7               | 4                             | 2                          |
| 20e         | yes             | 3.0  | yes            | -1.78            | -2.64              | 1.28               | 87.3                  | no           | yes           | Non-cardiotoxic  | no        | no          | no                   | no       | 41.7         | 352.39         | 7               | 5                             | 2                          |
| 21a         | yes             | 4.5  | yes            | 0.30             | -0.58              | 1.31               | 92.7                  | no           | yes           | Non-cardiotoxic  | no        | no          | no                   | no       | 43.6         | 288.35         | 3               | 2                             | 1                          |

|     |     |     |     |       |       |      |       |     |     |                   |      |    |      |    |       |        |   |   |   |
|-----|-----|-----|-----|-------|-------|------|-------|-----|-----|-------------------|------|----|------|----|-------|--------|---|---|---|
| 21b | yes | 3.6 | yes | 0.13  | -1.89 | 1.39 | 94.5  | no  | yes | Non-cardiotoxic   | no   | no | no   | no | 43.6  | 289.34 | 3 | 3 | 1 |
| 21c | yes | 4.0 | yes | 0.46  | -1.94 | 1.40 | 93.95 | no  | yes | Non-cardiotoxic   | no   | no | no   | no | 43.6  | 289.34 | 3 | 3 | 1 |
| 21d | yes | 3.5 | yes | 0.26  | -1.89 | 1.32 | 91.3  | no  | yes | Non-cardiotoxic   | no   | no | no   | no | 55.2  | 277.33 | 3 | 2 | 2 |
| 21e | yes | 3.1 | yes | -0.62 | -2.22 | 1.29 | 87.2  | no  | yes | Non-cardiotoxic   | no   | no | no   | no | 56.7  | 278.32 | 3 | 3 | 2 |
| 22a | yes | 3.7 | yes | -0.06 | -1.91 | 1.29 | 91.6  | no  | yes | Non-cardiotoxic   | no   | no | no   | no | 44.2  | 290.32 | 3 | 3 | 2 |
| 22b | yes | 2.8 | no  | -0.06 | -2.15 | 1.05 | 93.4  | no  | yes | Non-cardiotoxic   | no   | no | no   | no | 44.2  | 291.31 | 3 | 4 | 2 |
| 22c | yes | 3.2 | no  | -0.08 | -2.21 | 1.12 | 92.9  | no  | yes | Non-cardiotoxic   | no   | no | no   | no | 44.2  | 291.31 | 3 | 4 | 2 |
| 22d | yes | 2.7 | no  | -0.55 | -2.16 | 1.20 | 90.2  | no  | yes | Non-cardiotoxic   | no   | no | no   | no | 55.7  | 279.30 | 3 | 3 | 3 |
| 22e | yes | 2.3 | yes | -0.79 | -2.49 | 1.10 | 86.1  | no  | yes | Non-cardiotoxic   | no   | no | no   | no | 57.3  | 280.29 | 3 | 4 | 3 |
| 23a | yes | 5.9 | yes | 0.17  | -0.18 | 1.08 | 89.6  | no  | yes | Non-cardiotoxic   | no   | no | no   | no | -15.4 | 370.50 | 4 | 2 | 1 |
| 23b | yes | 5.1 | yes | -0.01 | -1.50 | 1.11 | 91.4  | no  | yes | Non-cardiotoxic   | no   | no | no   | no | -15.4 | 371.48 | 4 | 3 | 1 |
| 23c | yes | 5.5 | yes | 0.32  | -1.55 | 1.13 | 90.8  | no  | yes | Weak or moderate  | no   | no | no   | no | -15.4 | 371.48 | 4 | 3 | 1 |
| 23d | yes | 4.9 | yes | 0.13  | -1.50 | 1.21 | 88.1  | no  | yes | Weak or moderate  | no   | no | no   | no | -0.2  | 359.47 | 4 | 2 | 2 |
| 23e | yes | 4.6 | yes | -0.60 | -1.82 | 1.22 | 84.1  | yes | yes | Weak or moderate  | no   | no | no   | no | -0.2  | 360.46 | 4 | 3 | 2 |
| 27  | yes | 4.7 | no  | -0.23 | -2.29 | 1.15 | 92.7  | no  | yes | Non-cardiotoxic   | no   | no | no   | no | -50.6 | 410.51 | 9 | 5 | 1 |
| 28  | yes | 4.8 | no  | 0.01  | -1.88 | 1.10 | 92.6  | no  | yes | Non-cardiotoxic   | no   | no | no   | no | -36.5 | 336.44 | 5 | 3 | 1 |
| 29  | yes | 4.0 | no  | 0.07  | -2.14 | 1.05 | 91.5  | no  | yes | Non-cardiotoxic   | no   | no | no   | no | -36.5 | 338.41 | 5 | 4 | 2 |
| 35  | yes | 5.1 | yes | 0.07  | -2.04 | 0.65 | 89.1  | no  | yes | Weak or moderate  | no   | no | no   | no | -0.9  | 409.53 | 8 | 4 | 2 |
| 36  | yes | 5.2 | yes | -0.01 | -1.62 | 1.22 | 89.0  | no  | yes | Non-cardiotoxic   | no   | no | no   | no | 0.5   | 355.45 | 4 | 2 | 2 |
| 37  | yes | 4.4 | yes | -0.57 | -1.88 | 0.85 | 87.9  | no  | yes | Non-cardiotoxic   | no   | no | no   | no | 0.5   | 337.42 | 4 | 3 | 3 |
| 38  | yes | 6.6 | yes | -0.15 | -1.23 | 1.19 | 85.8  | no  | yes | Weak or moderate  | no   | no | no   | no | -5.2  | 417.60 | 5 | 2 | 2 |
| 41  | yes | 4.3 | no  | 0.07  | -2.38 | 1.12 | 90.8  | no  | yes | Strong or extreme | high | no | high | no | 12.5  | 371.51 | 9 | 4 | 2 |
| 42  | yes | 4.4 | yes | 0.28  | -0.84 | 1.54 | 90.7  | no  | yes | Strong or extreme | high | no | high | no | 27.6  | 297.43 | 5 | 2 | 2 |
| 43  | yes | 3.6 | no  | 0.03  | -2.22 | 1.30 | 89.6  | no  | yes | Strong or extreme | high | no | high | no | 27.7  | 299.40 | 5 | 3 | 3 |
| 44  | yes | 5.9 | yes | 0.13  | -0.39 | 1.02 | 87.6  | no  | yes | Strong or extreme | high | no | high | no | -25.8 | 379.57 | 6 | 2 | 2 |
| 51  | yes | 4.2 | yes | -0.02 | -1.97 | 1.22 | 89.6  | no  | yes | Non-cardiotoxic   | no   | no | no   | no | -19.4 | 368.48 | 6 | 3 | 2 |
| 52  | yes | 5.0 | yes | 0.21  | -0.96 | 1.59 | 89.2  | no  | yes | Non-cardiotoxic   | no   | no | no   | no | -2.1  | 322.45 | 4 | 1 | 2 |

|     |     |     |     |       |       |       |      |    |     |                   |     |    |      |    |       |        |        |   |   |
|-----|-----|-----|-----|-------|-------|-------|------|----|-----|-------------------|-----|----|------|----|-------|--------|--------|---|---|
| 53  | yes | 4.5 | yes | 0.17  | -0.97 | 1.59  | 89.4 | no | yes | Non-cardiotoxic   | no  | no | no   | no | -2.1  | 308.43 | 4      | 1 | 2 |
| 54  | yes | 2.6 | no  | -0.14 | -2.29 | 1.35  | 91.8 | no | yes | Non-cardiotoxic   | no  | no | no   | no | 11.4  | 312.37 | 6      | 3 | 2 |
| 55  | yes | 3.4 | yes | 0.31  | -1.22 | 1.60  | 89.8 | no | yes | Non-cardiotoxic   | no  | no | no   | no | 10.2  | 266.34 | 4      | 1 | 2 |
| 58  | yes | 5.3 | yes | 0.20  | -0.87 | 1.46  | 88.1 | no | yes | Non-cardiotoxic   | no  | no | no   | no | -29.5 | 308.43 | 3      | 1 | 2 |
| 59  | yes | 4.5 | yes | -0.07 | -1.65 | 1.38  | 87.5 | no | yes | Non-cardiotoxic   | no  | no | no   | no | -29.0 | 310.40 | 3      |   | 2 |
| 60  | yes | 3.7 | no  | 0.35  | -0.99 | 1.33  | 88.8 | no | no  | Non-cardiotoxic   | no  | no | no   | no | 0.1   | 252.32 | 3      | 1 | 2 |
| 61  | yes | 2.9 | no  | -0.01 | -1.96 | 1.30  | 87.9 | no | yes | Non-cardiotoxic   | no  | no | no   | no | 0.2   | 254.29 | 3      | 2 | 3 |
| 69  | yes | 4.5 | no  | 0.05  | -2.20 | 0.74  | 90.8 | no | yes | Weak or moderate  | no  | no | no   | no | -4.0  | 410.51 | 7      | 4 | 2 |
| 70  | yes | 4.7 | yes | 0.19  | -1.78 | 1.51  | 91.2 | no | yes | Weak or moderate  | no  | no | no   | no | -26.1 | 336.44 | 3      | 2 | 2 |
| 71  | yes | 5.5 | yes | 0.10  | -1.87 | 1.00  | 93.1 | no | yes | Weak or moderate  | no  | no | no   | no | -42.3 | 392.50 | 7      | 5 | 0 |
| 72  | yes | 5.6 | yes | 0.47  | -1.00 | 1.72  | 93.8 | no | yes | Non-cardiotoxic   | no  | no | no   | no | -28.5 | 318.42 | 3      | 3 | 0 |
| 77  | yes | 5.3 | yes | -0.04 | -2.02 | 1.04  | 95.8 | no | yes | Strong or extreme | no  | no | no   | no | -54.8 | 394.52 | 8      | 5 | 0 |
| 78  | yes | 5.4 | yes | 0.38  | -1.07 | 1.68  | 95.1 | no | yes | Strong or extreme | no  | no | no   | no | -41.0 | 320.44 | 4      | 3 | 0 |
| 79  | yes | 3.8 | yes | -0.18 | -2.30 | 1.09  | 96.2 | no | yes | Strong or extreme | no  | no | no   | no | -2.4  | 338.41 | 8      | 5 | 0 |
| 80  | yes | 3.9 | no  | 0.54  | -1.31 | 1.81  | 95.7 | no | yes | Strong or extreme | no  | no | no   | no | -1.0  | 264.33 | 4      | 3 | 0 |
| 82  | yes | 4.6 | yes | 0.00  | -1.85 | 1.39  | 93.3 | no | yes | Weak or moderate  | no  | no | no   | no | -40.4 | 322.41 | 4      | 4 | 1 |
| 88  | yes | 4.9 | yes | 0.10  | -1.95 | 1.02  | 94.4 | no | yes | Weak or moderate  | no  | no | no   | no | -44.3 | 380.49 | 7      | 5 | 0 |
| 89  | yes | 5.0 | yes | 0.47  | -1.06 | 1.75  | 95.2 | no | yes | Non-cardiotoxic   | no  | no | no   | no | -30.5 | 306.41 | 3      | 3 | 0 |
| 93  | yes | 4.6 | no  | 0.26  | -1.31 | 1.90  | 97.6 | no | no  | Strong or extreme | no  | no | no   | no | -2.1  | 263.34 | 4      | 3 | 0 |
| 98  | yes | 5.6 | no  | 0.05  | -1.61 | 0.27  | 79.5 | no | yes | Non-cardiotoxic   | low | no | high | no | -26.6 | 333.44 | 3      | 2 | 2 |
| 99  | yes | 5.1 | no  | 0.01  | -1.68 | -2.97 | 13.4 | no | yes | Non-cardiotoxic   | no  | no | high | no | -26.6 | 319.41 | 45,123 | 3 | 2 |
| 100 | yes | 5.5 | no  | 0.03  | -1.73 | 0.25  | 79.7 | no | yes | Weak or moderate  | low | no | high | no | -24.0 | 335.45 | 4      | 2 | 2 |
| 101 | yes | 5.0 | no  | -0.02 | -1.79 | 1.33  | 80.8 | no | yes | Weak or moderate  | no  | no | high | no | -24.0 | 321.42 | 4      | 2 | 2 |
